# Supplementary material for: Reconciling flood-risk reduction and wetland resilience behind coastal floodgates
Source: Research Square preprint supplement (doi:10.21203/rs.3.rs-7100485/v1), 2025-07-23
Supplement: Supplementary file 1 [file 4b757d07d19a3d9a0ec70a49.docx]

**Reconciling flood-risk reduction and wetland resilience behind coastal floodgates**

**Supplementary Information**

Alessandro Michielotto1,2*, Alvise Finotello1, Riccardo Alvise Mel3, Eli D. Lazarus4, Luca Carniello5, Davide Tognin5, Andrea D’Alpaos1,*

1) Department of Geosciences, University of Padova, Padova, Italy

2) Department of Land, Environment, Agriculture and Forestry, University of Padova, Padova, Italy

3) Italian Institute for Environmental Protection and Research (ISPRA), Roma, Italy

4) School of Geography and Environmental Science, University of Southampton, Southampton, United Kingdom

5) Department of Civil, Environmental, and Architectural Engineering, University of Padova, Padova, Italy

***) Corresponding authors**

**Email**: [alessandro.michielotto@unipd.it](mailto:alessandro.michielotto@unipd.it) (A. Michielotto); [andrea.dalpaos@unipd.it](mailto:andrea.dalpaos@unipd.it) (A. D’Alpaos)

**List of Contents**

*Supplemental Figures*

[**Figure S1**: Computational grid. 1](#_Toc202947457)

[F**igure S2**: Flooding in Venice**.** 2](#_Toc202947458)

[**Figure** **S3**:Salt marsh flooding. 3](#_Toc202947459)

[**Figure** **S4**:Floodgate activations during the 2020-2023 period. 4](#_Toc202947460)

*Supplemental Tables*

[**Table** **S1**: Model efficiency for water level**.** 8](#_Toc202947568)

[**Table** **S2**: Maximum water level. 10](#_Toc202947569)


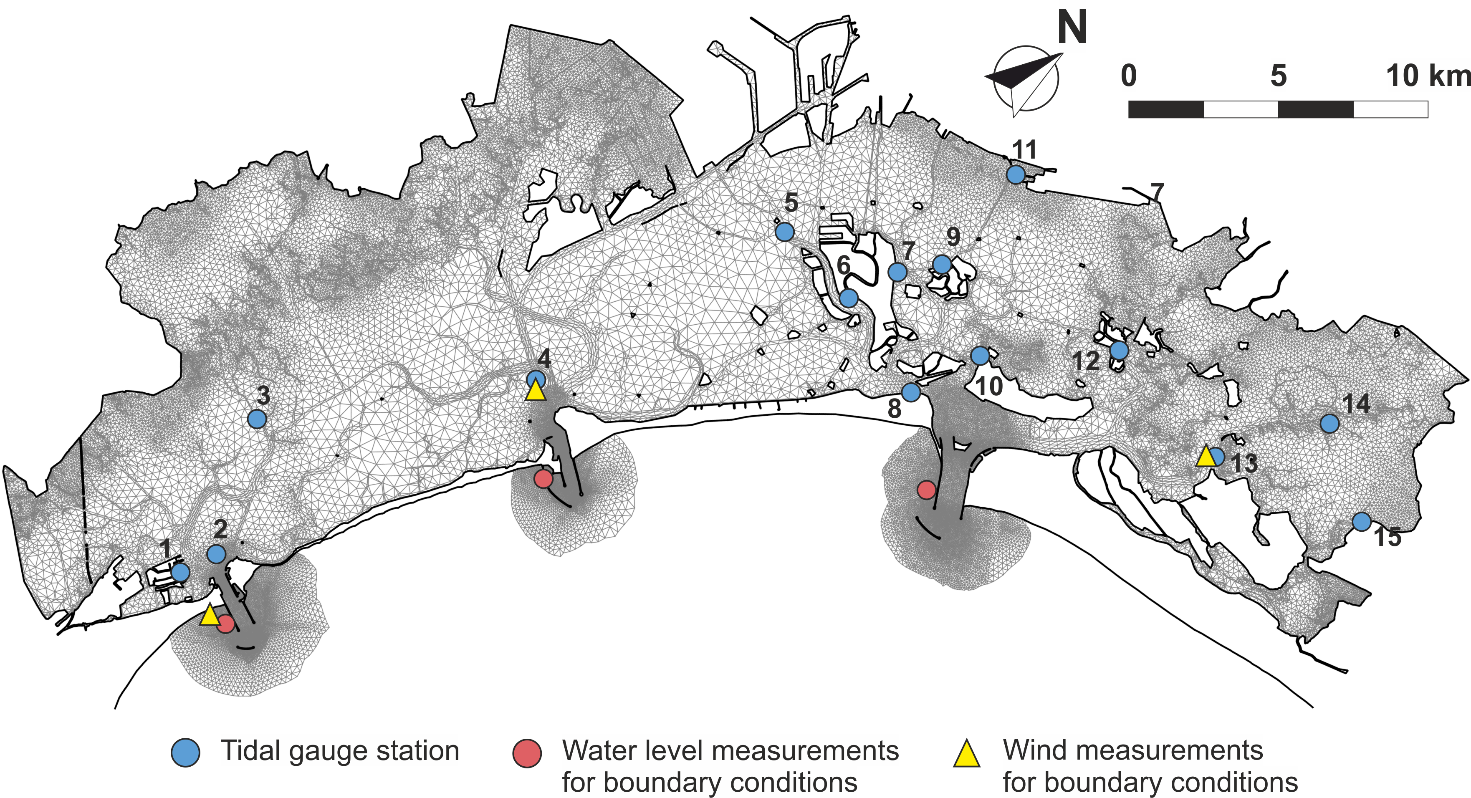


Figure S1: **Computational grid**. Red circles indicate water level measurement stations adopted as boundary conditions. Yellow triangles indicate wind measurement stations adopted as boundary conditions. Blue circles indicate tide gauges whose measurements are used to test the model (see Tables S1, S2). 1) Chioggia Città. 2) Chioggia Porto. 3) Petta de Bo. 4) Malamocco Porto. 5) San Giorgio. 6) Punta Salute. 7) Misericordia. 8) San Nicolò. 9) Murano. 10) Sant’Erasmo. 11) Tessera. 12) Burano. 13) Laguna Nord – Saline. 14) Canal Ancora. 15) Grassabò.


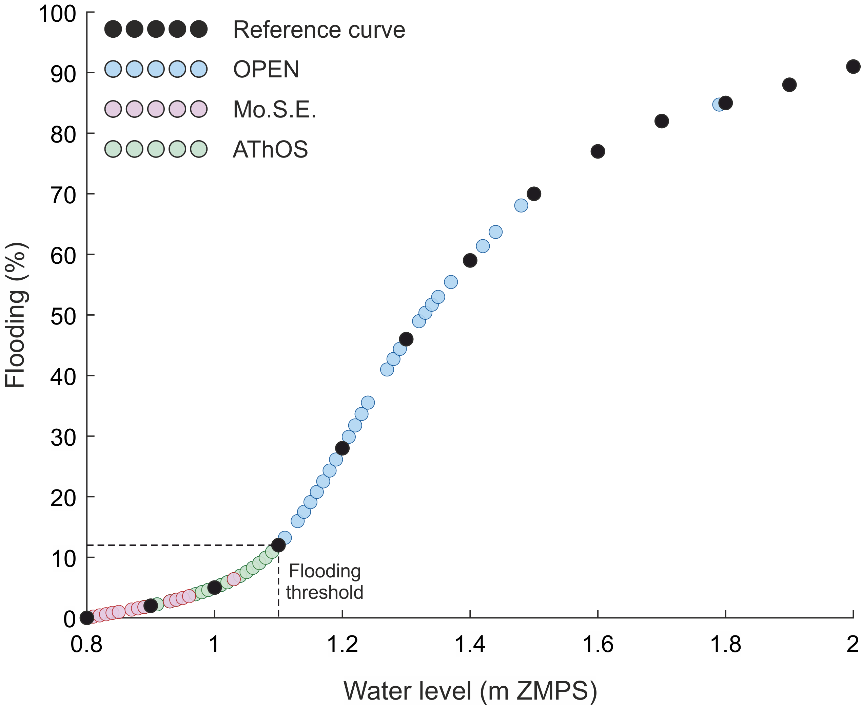


Figure S2: **Flooding in Venice.** Flooded area of Venice’s historic center as a function of water level during floodgate activations for the Open (blue), Mo.S.E. (red), and AThOS (green) scenarios. Black circles represent reference data from the Centro Previsioni e Segnalazioni Maree([comune.venezia](https://www.(comune.venezia))).


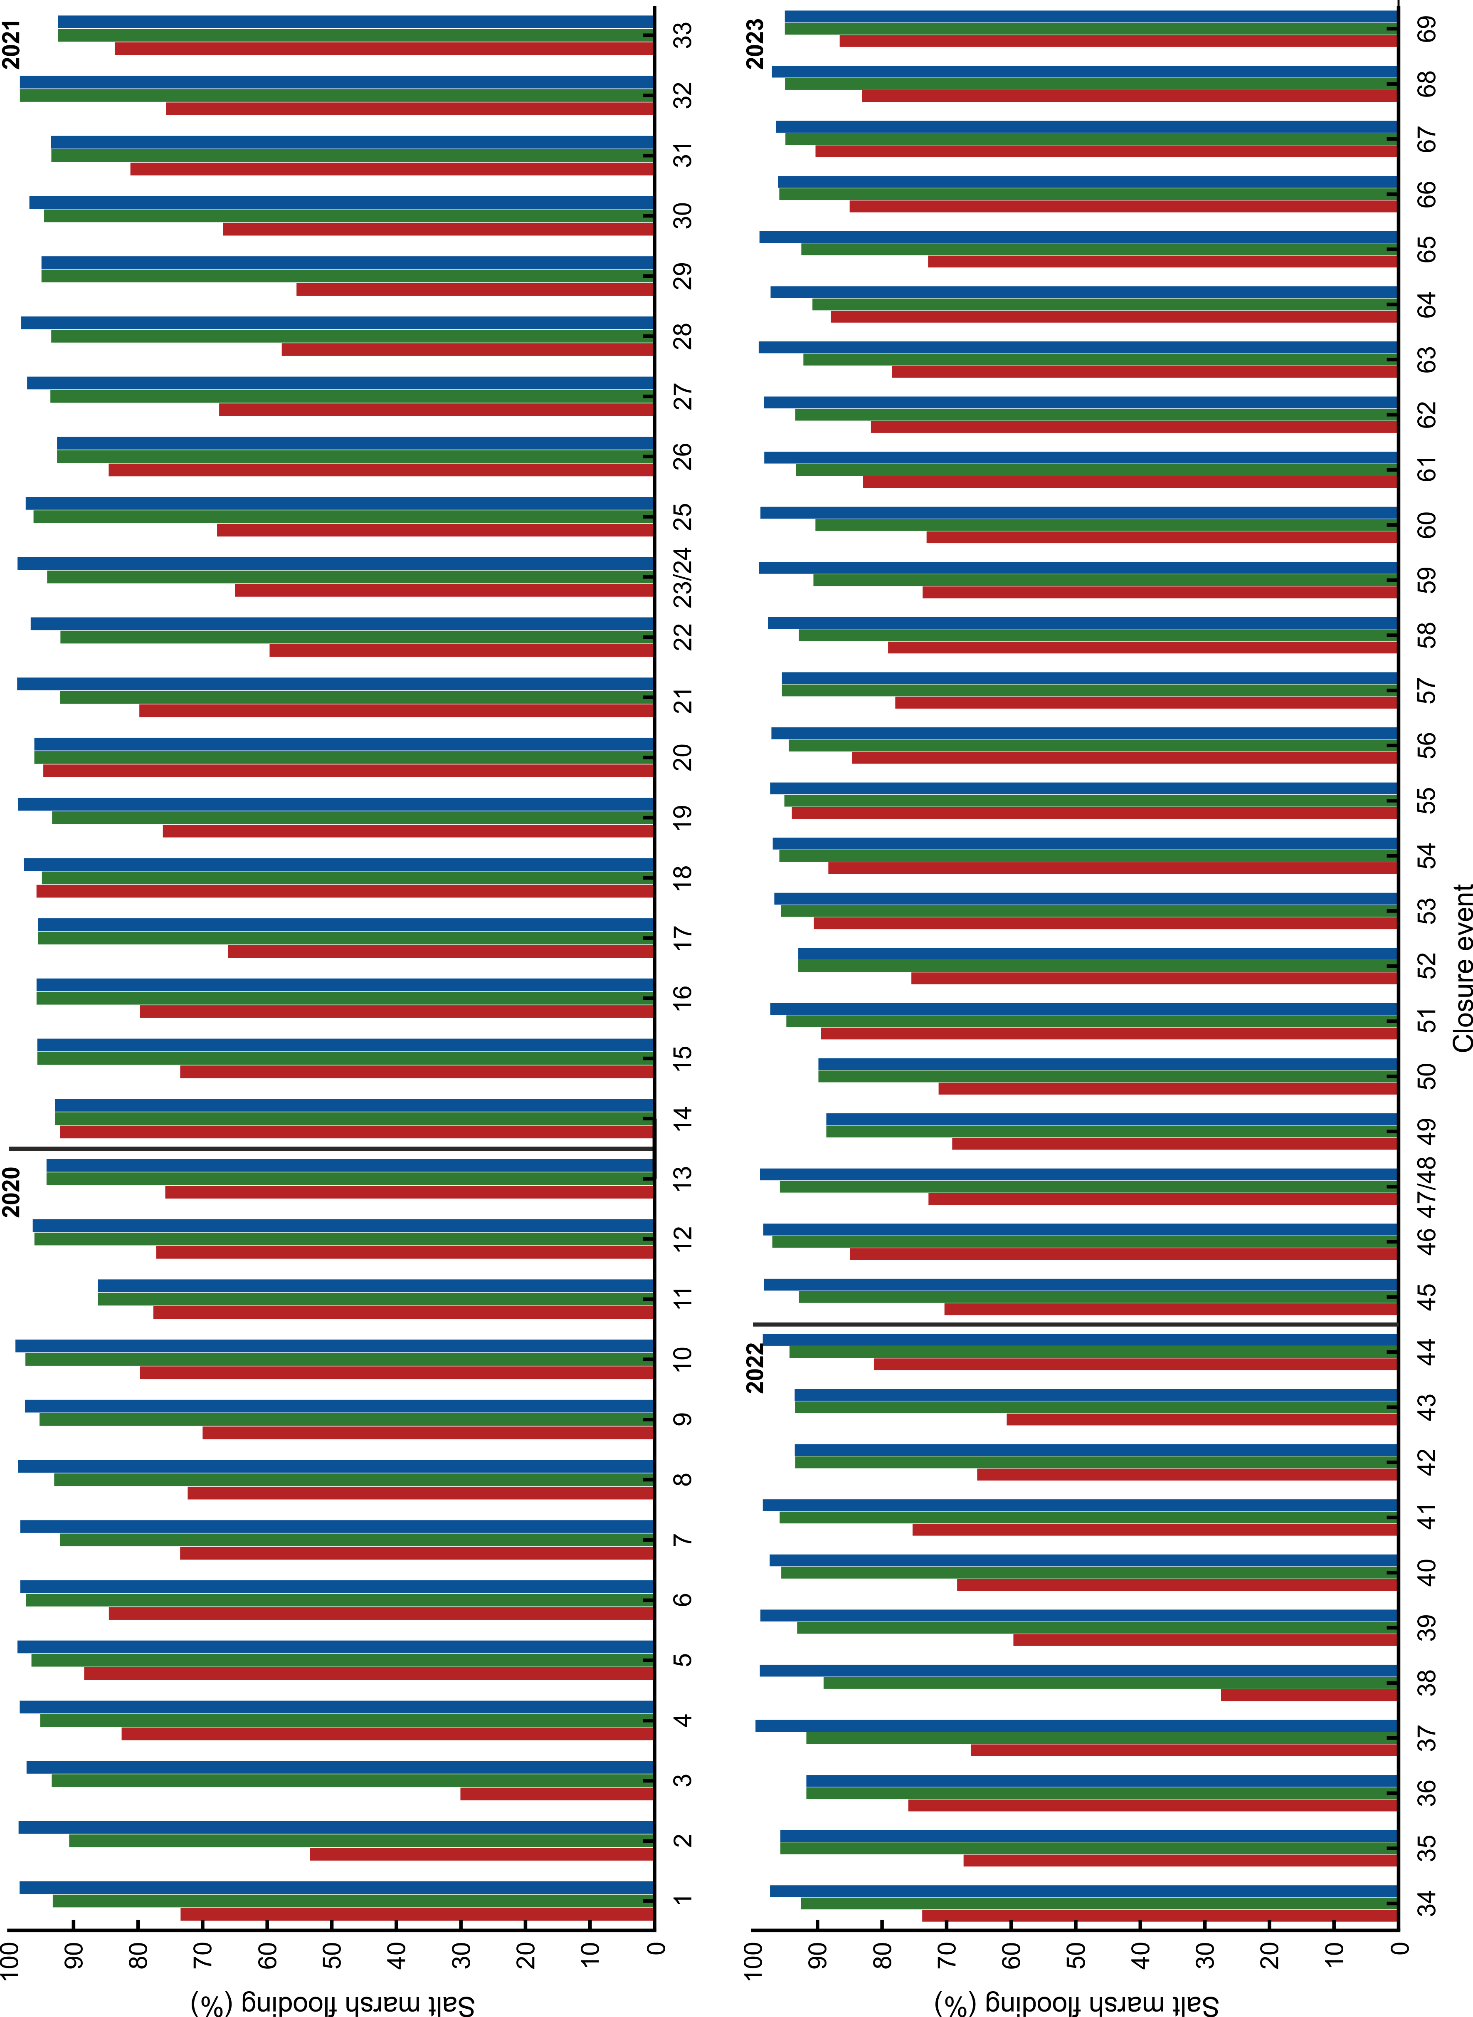


Figure S3: **Salt marsh flooding**. Salt marsh flooding extent during storm surge events from 2020 to 2023 under the “MoSE” (red), “AThOS” (green), and “Open” (blue) scenarios. Values indicate the percentage of salt marsh area submerged during each event. X-axis values correspond to the sequential number of Mo.S.E. activations over the study period.


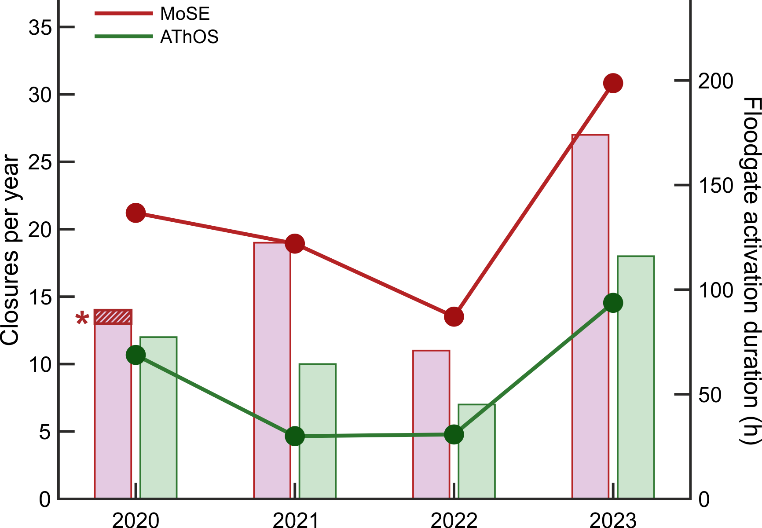


Figure S4: **Floodgate activations during the 2020-2023 period.** Bar chart shows the yearly number of floodgate activations under the recorded Mo.S.E. operations (red) and the hypothetical “AThOS” scenario (green). Lines indicate the corresponding cumulative duration of closures. [*] On 8 December 2020, the Mo.S.E. system was not activated despite being operational, resulting in the flooding of Venice.

|  | Closure | | MAE | | | RMSE | | | NSE | | |
| --- | --- | --- | --- | --- | --- | --- | --- | --- | --- | --- | --- |
|  | # | Date | min | max | mean (dev std) | min | max | mean (dev std) | min | max | mean (dev std) |
| 2020 | 1 | Oct 03 | 0.010 | 0.033 | 0.019 ± 0.007 | 0.013 | 0.040 | 0.024 ± 0.009 | 0.796 | 0.992 | 0.922 ± 0.071 |
| 2 | Oct 15 | 0.018 | 0.055 | 0.003 ± 0.001 | 0.020 | 0.077 | 0.004 ± 0.016 | 0.679 | 0.975 | 0.897 ± 0.007 |
| 3 | Oct 16 | 0.013 | 0.049 | 0.023 ± 0.007 | 0.014 | 0.082 | 0.032 ± 0.012 | 0.607 | 0.987 | 0.879 ± 0.109 |
| 4 | Dec 02 | 0.022 | 0.054 | 0.037 ± 0.007 | 0.028 | 0.070 | 0.045 ± 0.009 | 0.739 | 0.980 | 0.851 ± 0.067 |
| 5 | Dec 04-06 | 0.024 | 0.039 | 0.031 ± 0.005 | 0.030 | 0.050 | 0.038 ± 0.006 | 0.728 | 0.902 | 0.823 ± 0.052 |
| 6 | Dec 09 | 0.021 | 0.045 | 0.028 ± 0.007 | 0.023 | 0.054 | 0.033 ± 0.008 | 0.705 | 0.967 | 0.892 ± 0.079 |
| 7 | Dec 10 | 0.011 | 0.038 | 0.024 ± 0.008 | 0.014 | 0.045 | 0.028 ± 0.009 | 0.770 | 0.990 | 0.914 ± 0.056 |
| 8 | Dec 11 | 0.012 | 0.034 | 0.021 ± 0.006 | 0.015 | 0.039 | 0.025 ± 0.007 | 0.846 | 0.988 | 0.938 ± 0.056 |
| 9 | Dec 12 | 0.013 | 0.027 | 0.019 ± 0.004 | 0.015 | 0.034 | 0.023 ± 0.005 | 0.719 | 0.929 | 0.879 ± 0.058 |
| 10 | Dec 28 | 0.017 | 0.031 | 0.024 ± 0.005 | 0.020 | 0.044 | 0.032 ± 0.008 | 0.807 | 0.981 | 0.921 ± 0.064 |
| 11 | Dec 29 | 0.011 | 0.043 | 0.021 ± 0.009 | 0.013 | 0.046 | 0.026 ± 0.009 | 0.886 | 0.988 | 0.951 ± 0.033 |
| 12 | Dec 30 | 0.009 | 0.046 | 0.021 ± 0.012 | 0.011 | 0.051 | 0.025 ± 0.013 | 0.904 | 0.998 | 0.972 ± 0.029 |
| 13 | Dec 31 | 0.016 | 0.047 | 0.025 ± 0.013 | 0.018 | 0.050 | 0.030 ± 0.010 | 0.925 | 0.989 | 0.959 ± 0.023 |
| 2021 | 14 | Jan 01 | 0.010 | 0.043 | 0.021 ± 0.010 | 0.011 | 0.046 | 0.023 ± 0.010 | 0.915 | 0.996 | 0.967 ± 0.028 |
| 15 | Jan 02 | 0.010 | 0.040 | 0.022 ± 0.006 | 0.013 | 0.045 | 0.028 ± 0.007 | 0.748 | 0.984 | 0.855 ± 0.074 |
| 16 | Jan 23 | 0.014 | 0.027 | 0.019 ± 0.004 | 0.017 | 0.036 | 0.024 ± 0.005 | 0.759 | 0.957 | 0.892 ± 0.058 |
| 17 | Jan 31 | 0.017 | 0.041 | 0.027 ± 0.007 | 0.024 | 0.065 | 0.035 ± 0.011 | 0.937 | 0.992 | 0.987 ± 0.015 |
| 18 | Feb 09 | 0.005 | 0.056 | 0.022 ± 0.015 | 0.008 | 0.057 | 0.026 ± 0.014 | 0.909 | 0.998 | 0.975 ± 0.025 |
| 19 | Feb 10 | 0.018 | 0.052 | 0.031 ± 0.010 | 0.025 | 0.054 | 0.038 ± 0.010 | 0.784 | 0.978 | 0.918 ± 0.052 |
| 20 | Feb 11 | 0.019 | 0.048 | 0.032 ± 0.009 | 0.023 | 0.051 | 0.035 ± 0.010 | 0.871 | 0.986 | 0.949 ± 0.032 |
| 21 | Nov 01 | 0.027 | 0.055 | 0.037 ± 0.007 | 0.030 | 0.069 | 0.044 ± 0.010 | 0.701 | 0.968 | 0.906 ± 0.031 |
| 22 | Nov 02 | 0.013 | 0.047 | 0.024 ± 0.011 | 0.017 | 0.055 | 0.029 ± 0.012 | 0.877 | 0.992 | 0.967 ± 0.032 |
| 23-24 | Nov 03-04 | 0.022 | 0.036 | 0.028 ± 0.004 | 0.026 | 0.060 | 0.036 ± 0.008 | 0.777 | 0.961 | 0.920 ± 0.044 |
| 25 | Nov 06 | 0.021 | 0.075 | 0.035 ± 0.015 | 0.024 | 0.116 | 0.045 ± 0.025 | 0.634 | 0.975 | 0.918 ± 0.092 |
| 26 | Nov 28 | 0.008 | 0.044 | 0.019 ± 0.009 | 0.013 | 0.048 | 0.023 ± 0.009 | 0.803 | 0.991 | 0.952 ± 0.045 |
| 27 | Dec 01 | 0.017 | 0.036 | 0.026 ± 0.006 | 0.020 | 0.041 | 0.030 ± 0.007 | 0.825 | 0.977 | 0.913 ± 0.049 |
| 28 | Dec 02 | 0.012 | 0.031 | 0.019 ± 0.005 | 0.015 | 0.036 | 0.026 ± 0.006 | 0.822 | 0.968 | 0.912 ± 0.040 |
| 29 | Dec 03 | 0.014 | 0.030 | 0.019 ± 0.005 | 0.016 | 0.042 | 0.024 ± 0.007 | 0.703 | 0.934 | 0.842 ± 0.079 |
| 30 | Dec 05 | 0.017 | 0.038 | 0.027 ± 0.007 | 0.019 | 0.042 | 0.031 ± 0.007 | 0.782 | 0.980 | 0.886 ± 0.063 |
| 31 | Dec 08 | 0.014 | 0.039 | 0.025 ± 0.006 | 0.018 | 0.047 | 0.031 ± 0.008 | 0.771 | 0.974 | 0.877 ± 0.050 |
| 32 | Dec 08 | 0.017 | 0.043 | 0.024 ± 0.006 | 0.021 | 0.049 | 0.029 ± 0.007 | 0.804 | 0.976 | 0.935 ± 0.041 |
| 33 | Dec 12 | 0.010 | 0.026 | 0.017 ± 0.005 | 0.011 | 0.042 | 0.021 ± 0.008 | 0.791 | 0.986 | 0.952 ± 0.048 |
| 2022 | 34 | Nov 04 | 0.016 | 0.036 | 0.024 ± 0.006 | 0.018 | 0.051 | 0.030 ± 0.009 | 0.747 | 0.974 | 0.904 ± 0.078 |
| 35 | Nov 05 | 0.017 | 0.059 | 0.033 ± 0.012 | 0.022 | 0.080 | 0.040 ± 0.016 | 0.827 | 0.976 | 0.913 ± 0.045 |
| 36 | Nov 21 | 0.010 | 0.069 | 0.027 ± 0.018 | 0.012 | 0.076 | 0.031 ± 0.019 | 0.889 | 0.997 | 0.970 ± 0.033 |
| 37 | Nov 22 | 0.017 | 0.044 | 0.033 ± 0.009 | 0.020 | 0.050 | 0.039 ± 0.010 | 0.621 | 0.975 | 0.863 ± 0.124 |
| 38 | Nov 23 | 0.020 | 0.035 | 0.027 ± 0.005 | 0.025 | 0.049 | 0.038 ± 0.008 | 0.736 | 0.944 | 0.891 ± 0.062 |
| 39 | Nov 24 | 0.021 | 0.035 | 0.026 ± 0.004 | 0.025 | 0.042 | 0.031 ± 0.005 | 0.837 | 0.970 | 0.922 ± 0.031 |
| 40 | Nov 25 | 0.014 | 0.033 | 0.020 ± 0.007 | 0.017 | 0.042 | 0.024 ± 0.009 | 0.635 | 0.970 | 0.894 ± 0.094 |
| 41 | Dec 04 | 0.021 | 0.079 | 0.034 ± 0.016 | 0.026 | 0.090 | 0.041 ± 0.017 | 0.836 | 0.959 | 0.916 ± 0.040 |
| 42 | Dec 05 | 0.013 | 0.052 | 0.022 ± 0.010 | 0.016 | 0.061 | 0.027 ± 0.012 | 0.849 | 0.964 | 0.940 ± 0.031 |
| 43 | Dec 09 | 0.013 | 0.028 | 0.021 ± 0.005 | 0.016 | 0.036 | 0.025 ± 0.007 | 0.864 | 0.957 | 0.930 ± 0.027 |
| 44 | Dec 16 | 0.016 | 0.029 | 0.023 ± 0.004 | 0.019 | 0.043 | 0.028 ± 0.007 | 0.784 | 0.963 | 0.916 ± 0.049 |
| 2023 | 45 | Jan 21 | 0.015 | 0.033 | 0.021 ± 0.0045 | 0.020 | 0.041 | 0.027 ± 0.007 | 0.865 | 0.976 | 0.948 ± 0.031 |
| 46 | Jan 22 | 0.014 | 0.052 | 0.025 ± 0.011 | 0.018 | 0.055 | 0.031 ± 0.010 | 0.773 | 0.959 | 0.840 ± 0.13 |
| 47 - 48 | Jan 22-23 | 0.019 | 0.039 | 0.026 ± 0.005 | 0.024 | 0.044 | 0.032 ± 0.006 | 0.840 | 0.948 | 0.914 ± 0.033 |
| 49 | Jan 23 | 0.011 | 0.054 | 0.029 ± 0.011 | 0.015 | 0.065 | 0.029 ± 0.011 | 0.764 | 0.991 | 0.919 ± 0.067 |
| 50 | May 16 | 0.017 | 0.034 | 0.024 ± 0.005 | 0.021 | 0.050 | 0.032 ± 0.009 | 0.612 | 0.949 | 0.859 ± 0.095 |
| 51 | Aug 28 | 0.018 | 0.041 | 0.026 ± 0.006 | 0.020 | 0.045 | 0.030 ± 0.007 | 0.662 | 0.958 | 0.871 ± 0.082 |
| 52 | Aug 29 | 0.015 | 0.046 | 0.029 ± 0.008 | 0.017 | 0.068 | 0.035 ± 0.012 | 0.884 | 0.992 | 0.954 ± 0.030 |
| 53 | Oct 19 | 0.012 | 0.040 | 0.024 ± 0.008 | 0.016 | 0.045 | 0.029 ± 0.008 | 0.914 | 0.991 | 0.963 ± 0.023 |
| 54 | Oct 20 | 0.013 | 0.039 | 0.022 ± 0.008 | 0.016 | 0.041 | 0.025 ± 0.008 | 0.679 | 0.951 | 0.877 ± 0.094 |
| 55 | Oct 24 | 0.009 | 0.060 | 0.031 ± 0.016 | 0.011 | 0.068 | 0.035 ± 0.0176 | 0.902 | 0.997 | 0.9678 ± 0.031 |
| 56 | Oct 24 | 0.016 | 0.033 | 0.024 ± 0.006 | 0.018 | 0.039 | 0.030 ± 0.007 | 0.745 | 0.986 | 0.911 ± 0.074 |
| 57 | Oct 25 | 0.014 | 0.043 | 0.024 ± 0.009 | 0.019 | 0.059 | 0.030 ± 0.011 | 0.766 | 0.973 | 0.908 ± 0.066 |
| 58 | Oct 26 | 0.013 | 0.044 | 0.025 ± 0.009 | 0.015 | 0.060 | 0.033 ± 0.015 | 0.576 | 0.985 | 0.877 ± 0.116 |
| 59 | Oct 27 | 0.013 | 0.038 | 0.024 ± 0.070 | 0.016 | 0.045 | 0.031 ± 0.031 | 0.840 | 0.985 | 0.934 ± 0.041 |
| 60 | Oct 28 | 0.017 | 0.047 | 0.027 ± 0.008 | 0.022 | 0.061 | 0.036 ± 0.014 | 0.841 | 0.976 | 0.935 ± 0.047 |
| 61 | Oct 29 | 0.015 | 0.032 | 0.023 ± 0.005 | 0.019 | 0.042 | 0.028 ± 0.006 | 0.871 | 0.969 | 0.935 ± 0.031 |
| 62 | Oct 30 | 0.020 | 0.045 | 0.030 ± 0.008 | 0.022 | 0.047 | 0.034 ± 0.008 | 0.742 | 0.961 | 0.868 ± 0.070 |
| 63 | Oct 30 | 0.014 | 0.028 | 0.020 ± 0.004 | 0.017 | 0.036 | 0.026 ± 0.006 | 0.867 | 0.974 | 0.939 ± 0.033 |
| 64 | Nov 02 | 0.017 | 0.035 | 0.024 ± 0.006 | 0.021 | 0.042 | 0.030 ± 0.007 | 0.872 | 0.956 | 0.931 ± 0.021 |
| 65 | Nov 05 | 0.022 | 0.036 | 0.030 ± 0.004 | 0.027 | 0.045 | 0.038 ± 0.005 | 0.762 | 0.919 | 0.841 ± 0.047 |
| 66 | Nov 10 | 0.015 | 0.039 | 0.028 ± 0.007 | 0.018 | 0.051 | 0.035 ± 0.009 | 0.692 | 0.983 | 0.841 ± 0.089 |
| 67 | Nov 28 | 0.018 | 0.042 | 0.027 ± 0.008 | 0.021 | 0.045 | 0.031 ± 0.008 | 0.776 | 0.968 | 0.911 ± 0.064 |
| 68 | Dec 02 | 0.014 | 0.050 | 0.028 ± 0.009 | 0.019 | 0.052 | 0.032 ± 0.009 | 0.730 | 0.920 | 0.868 ± 0.050 |
| 69 | Dec 12 | 0.014 | 0.030 | 0.019 ± 0.005 | 0.017 | 0.033 | 0.025 ± 0.006 | 0.844 | 0.964 | 0.916 ± 0.045 |

Table S1: **Model efficiency for water level**. Model efficiency for water level computed in the available measurement stations (comune.venezia.it/node/7498; venezia.isprambiente.it/rete-meteo-mareografica) estimated through Mean Absolute Error (MAE), Root Mean Squared Error (RMSE) and Nash-Sutcliffe Efficiency (NSE), defined as 1-∑(d-m)/∑(d-D), where d is the measured datum, m is the corresponding model estimate, and D is the mean of the measured data. Performance categories can be defined as follows: NSE >0.65 excellent (***); ME = 0.65–0.5 very good (**); ME = 0.5–0.2 good (**); ME <0.2 poor (*).

|  | Closure | | Punta Salute (m ZMPS) | | | Chioggia (m ZMPS) | | | Burano (m ZMPS) | | |
| --- | --- | --- | --- | --- | --- | --- | --- | --- | --- | --- | --- |
| # | Date | MoSE | AThOS | OPEN | MoSE | AThOS | OPEN | MoSE | AThOS | OPEN |
| 2020 | 1 | Oct 03 | 0.72 | 1.02 | 1.24 | 0.67 | 0.96 | 1.20 | 0.74 | 0.94 | 1.17 |
| 2 | Oct 15 | 0.63 | 0.98 | 1.29 | 0.90 | 1.24 | 1.44 | 0.48 | 0.78 | 1.13 |
| 3 | Oct 16 | 0.50 | 1.03 | 1.14 | 0.52 | 1.07 | 1.15 | 0.46 | 0.90 | 1.05 |
| 4 | Dec 02 | 0.74 | 1.01 | 1.19 | 1.10 | 1.34 | 1.39 | 0.60 | 0.89 | 1.09 |
| 5 | Dec 04-06 | 0.95 | 1.08 | 1.28 | 0.92 | 1.07 | 1.25 | 0.91 | 1.08 | 1.28 |
| 6 | Dec 09 | 0.84 | 1.10 | 1.19 | 0.84 | 1.28 | 1.27 | 0.80 | 1.06 | 1.12 |
| 7 | Dec 10 | 0.73 | 1.03 | 1.29 | 0.75 | 1.01 | 1.28 | 0.72 | 0.94 | 1.23 |
| 8 | Dec 11 | 0.73 | 1.04 | 1.27 | 0.76 | 1.02 | 1.27 | 0.73 | 0.96 | 1.22 |
| 9 | Dec 12 | 0.76 | 1.07 | 1.17 | 0.76 | 1.08 | 1.16 | 0.71 | 1.03 | 1.15 |
| 10 | Dec 28 | 0.81 | 1.10 | 1.42 | 0.75 | 1.21 | 1.33 | 0.85 | 1.10 | 1.34 |
| 11* | Dec 29 | 0.71 | 0.89 | 0.89 | 0.77 | 0.89 | 0.89 | 0.67 | 0.85 | 0.85 |
| 12 | Dec 30 | 0.79 | 1.09 | 1.10 | 0.98 | 1.09 | 1.10 | 0.75 | 1.01 | 1.07 |
| 13* | Dec 31 | 0.71 | 1.04 | 1.04 | 0.74 | 1.02 | 1.02 | 0.70 | 0.99 | 0.99 |
| 2021 | 14* | Jan 01 | 0.85 | 0.99 | 0.99 | 0.94 | 1.00 | 1.00 | 0.79 | 0.97 | 0.97 |
| 15* | Jan 02 | 0.74 | 1.03 | 1.03 | 0.89 | 1.11 | 1.11 | 0.66 | 0.98 | 0.98 |
| 16* | Jan 23 | 0.82 | 1.09 | 1.09 | 0.76 | 1.02 | 1.02 | 0.81 | 1.09 | 1.09 |
| 17* | Jan 31 | 0.75 | 1.05 | 1.04 | 0.77 | 1.10 | 1.10 | 0.64 | 0.97 | 0.97 |
| 18 | Feb 09 | 1.03 | 1.06 | 1.18 | 1.11 | 1.07 | 1.18 | 0.94 | 1.01 | 1.15 |
| 19 | Feb 10 | 0.79 | 1.04 | 1.27 | 0.82 | 1.02 | 1.27 | 0.75 | 0.97 | 1.21 |
| 20* | Feb 11 | 0.93 | 1.08 | 1.08 | 1.01 | 1.07 | 1.07 | 0.80 | 1.04 | 1.04 |
| 21 | Nov 01 | 0.83 | 1.03 | 1.35 | 0.81 | 0.90 | 1.30 | 0.82 | 0.90 | 1.28 |
| 22 | Nov 02 | 0.66 | 1.04 | 1.13 | 0.73 | 1.03 | 1.14 | 0.60 | 0.86 | 1.01 |
| 23-24* | Nov 03-04 | 0.54 – 0.71 | 0.99 - 1.03 | 1.32 - 1.03 | 0.73 – 0.70 | 1.00 - 1.02 | 1.32 - 1.02 | 0.57 - 0.70 | 0.90 - 1.00 | 1.23 - 1.04 |
| 25 | Nov 06 | 0.71 | 1.07 | 1.11 | 0.87 | 1.21 | 1.20 | 0.62 | 0.93 | 1.03 |
| 26* | Nov 28 | 0.83 | 1.00 | 1.00 | 0.84 | 1.00 | 1.00 | 0.80 | 0.98 | 0.98 |
| 27 | Dec 01 | 0.76 | 1.03 | 1.14 | 0.75 | 1.04 | 1.14 | 0.69 | 0.93 | 1.07 |
| 28 | Dec 02 | 0.67 | 1.03 | 1.21 | 0.69 | 1.04 | 1.21 | 0.66 | 0.96 | 1.14 |
| 29* | Dec 03 | 0.66 | 1.05 | 1.04 | 0.68 | 1.07 | 1.07 | 0.63 | 1.01 | 1.01 |
| 30 | Dec 05 | 0.75 | 1.04 | 1.13 | 0.71 | 1.05 | 1.12 | 0.69 | 1.01 | 1.10 |
| 31* | Dec 08 | 0.75 | 1.01 | 1.01 | 0.96 | 1.03 | 1.03 | 0.69 | 0.94 | 0.94 |
| 32 | Dec 08 | 0.80 | 1.05 | 1.22 | 0.85 | 1.11 | 1.21 | 0.79 | 1.03 | 1.19 |
| 33* | Dec 12 | 0.71 | 0.99 | 0.99 | 0.92 | 1.03 | 1.03 | 0.78 | 0.98 | 0.98 |
| 2022 | 34 | Nov 04 | 0.82 | 1.04 | 1.18 | 0.66 | 0.92 | 1.10 | 0.79 | 0.97 | 1.16 |
| 35* | Nov 05 | 0.75 | 1.06 | 1.06 | 0.77 | 1.12 | 1.12 | 0.66 | 0.96 | 0.96 |
| 36* | Nov 21 | 0.71 | 0.98 | 0.98 | 0.93 | 1.01 | 1.01 | 0.65 | 0.92 | 0.92 |
| 37 | Nov 22 | 0.66 | 0.94 | 1.79 | 1.10 | 1.17 | 1.95 | 0.60 | 0.86 | 1.62 |
| 38 | Nov 23 | 0.53 | 0.98 | 1.40 | 0.59 | 1.00 | 1.40 | 0.51 | 0.95 | 1.39 |
| 39 | Nov 24 | 0.65 | 1.03 | 1.33 | 0.73 | 1.03 | 1.33 | 0.66 | 0.97 | 1.32 |
| 40 | Nov 25 | 0.65 | 1.07 | 1.15 | 0.67 | 1.10 | 1.16 | 0.68 | 1.05 | 1.15 |
| 41 | Dec 04 | 0.79 | 1.05 | 1.22 | 0.92 | 1.24 | 1.35 | 0.69 | 0.94 | 1.12 |
| 42* | Dec 05 | 0.69 | 1.02 | 1.02 | 0.70 | 1.02 | 1.02 | 0.64 | 0.96 | 0.96 |
| 43* | Dec 09 | 0.65 | 1.01 | 1.01 | 0.70 | 1.03 | 1.03 | 0.62 | 0.96 | 0.96 |
| 44 | Dec 16 | 0.82 | 1.05 | 1.23 | 0.85 | 1.04 | 1.22 | 0.84 | 1.01 | 1.21 |
| 2023 | 45 | Jan 21 | 0.78 | 1.01 | 1.21 | 0.78 | 1.04 | 1.22 | 0.74 | 0.95 | 1.15 |
| 46 | Jan 22 | 0.78 | 1.05 | 1.17 | 0.94 | 1.23 | 1.25 | 0.79 | 1.03 | 1.15 |
| 47* - 48 | Jan 22-23 | 0.75 - 0.64 | 0.97 - 1.04 | 0.97-1.32 | 0.78 – 0.87 | 1.04 - 1.19 | 1.04-1.52 | 0.65 - 0.61 | 0.90 - 0.92 | 0.87 - 1.24 |
| 49* | Jan 23 | 0.71 | 0.91 | 0.91 | 0.76 | 0.96 | 0.97 | 0.61 | 0.82 | 0.83 |
| 50* | May 16 | 0.69 | 0.93 | 0.93 | 0.78 | 0.97 | 0.97 | 0.67 | 0.90 | 0.90 |
| 51 | Aug 28 | 0.89 | 1.04 | 1.16 | 0.89 | 1.04 | 1.11 | 0.86 | 1.01 | 1.12 |
| 52* | Aug 29 | 0.75 | 1.01 | 1.01 | 0.78 | 1.00 | 1.00 | 0.70 | 0.92 | 0.92 |
| 53 | Oct 19 | 0.90 | 1.07 | 1.11 | 0.92 | 1.10 | 1.10 | 0.87 | 1.01 | 1.08 |
| 54* | Oct 20 | 0.96 | 1.09 | 1.09 | 1.06 | 1.10 | 1.10 | 0.86 | 1.08 | 1.13 |
| 55 | Oct 24 | 0.84 | 1.03 | 1.17 | 0.84 | 1.06 | 1.12 | 0.93 | 1.00 | 1.12 |
| 56 | Oct 24 | 0.78 | 1.07 | 1.14 | 0.77 | 1.05 | 1.11 | 0.86 | 1.05 | 1.12 |
| 57* | Oct 25 | 0.81 | 1.06 | 1.07 | 0.82 | 1.04 | 1.04 | 0.74 | 1.02 | 1.02 |
| 58 | Oct 26 | 0.74 | 1.05 | 1.18 | 0.74 | 1.04 | 1.16 | 0.74 | 0.94 | 1.11 |
| 59 | Oct 27 | 0.79 | 1.02 | 1.44 | 0.78 | 0.97 | 1.42 | 0.76 | 0.96 | 1.39 |
| 60 | Oct 28 | 0.83 | 0.98 | 1.34 | 0.85 | 0.98 | 1.32 | 0.75 | 0.92 | 1.27 |
| 61 | Oct 29 | 0.81 | 1.02 | 1.21 | 0.82 | 1.03 | 1.20 | 0.80 | 0.97 | 1.17 |
| 62 | Oct 30 | 0.81 | 1.04 | 1.23 | 0.70 | 1.05 | 1.21 | 0.77 | 0.98 | 1.19 |
| 63 | Oct 30 | 0.87 | 1.05 | 1.48 | 0.92 | 0.95 | 1.37 | 0.86 | 1.06 | 1.42 |
| 64 | Nov 02 | 0.94 | 1.00 | 1.13 | 0.82 | 0.95 | 1.10 | 0.91 | 1.08 | 1.16 |
| 65 | Nov 05 | 0.77 | 1.04 | 1.37 | 0.75 | 0.95 | 1.37 | 0.78 | 0.99 | 1.35 |
| 66* | Nov 10 | 0.84 | 1.09 | 1.09 | 0.83 | 1.06 | 1.06 | 0.78 | 1.04 | 1.04 |
| 67 | Nov 28 | 0.88 | 1.07 | 1.11 | 0.86 | 1.07 | 1.08 | 0.86 | 1.01 | 1.08 |
| 68 | Dec 02 | 0.84 | 1.07 | 1.20 | 0.77 | 1.04 | 1.09 | 0.86 | 1.08 | 1.19 |
| 69* | Dec 12 | 0.82 | 1.05 | 1.05 | 0.85 | 1.05 | 1.05 | 0.81 | 1.03 | 1.03 |

Table S2: **Maximum water level**. Modelled water levels maxima during storm surges at three reference stations for the MoSE, OPEN and AThOS scenarios. Safety threshold at Venice (Punta Salute) and Burano: 1.10 m ZMPS; Safety threshold at Chioggia: 1.30 m ZMPS. Grey lines indicate partial closure of the lagoon (i.e., floodgates were rise in one or two inlets out of three). Closures marked with (*) indicate an unnecessary floodgate activation.
